# Supplementary material for: Comparison of AI-Generated and Clinician-Designed Multiple Choice Questions in Emergency Medicine Exam: A Psychometric Analysis
Source: Research Square preprint supplement (doi:10.21203/rs.3.rs-6319788/v1), 2025-05-16
Supplement: Supplementary file 2 [file 8e083d70cb599de5b82d0546.docx]

1.A 45-year-old male patient is brought to the emergency department after a sudden loss of consciousness at home in the early morning hours. According to his wife, the incident began when the patient clutched his chest and collapsed. When the ambulance team arrived at the scene, the patient was found to be in ventricular fibrillation (VF) on the monitor, and cardiopulmonary resuscitation (CPR) was immediately initiated. After being defibrillated, the patient was transported to the emergency department.

What is the most likely cause of this patient’s sudden cardiac death?

A. Hypertrophic cardiomyopathy
B. Primary pulmonary hypertension
C. Coronary artery disease
D. Brugada syndrome
E. Long QT syndrome

2. Which of the following is **not** a risk factor for sudden cardiac death?

A. Severe left ventricular dysfunction
B. Hypercapnia
C. Hypertrophic cardiomyopathy
D. Brugada syndrome
E. Long QT syndrome

3. A 22-year-old male patient is brought to the emergency department after being stabbed. His level of consciousness is decreased, his heart rate is 130 bpm, and his blood pressure is measured at 80/50 mmHg. On physical examination, abdominal distension and marked tenderness in the left lower quadrant are noted. After initiating rapid fluid resuscitation, the patient's blood pressure rises to 100/60 mmHg but begins to drop again within 10 minutes.

What is the most appropriate next step in the management of this patient?

A. Hypertonic saline infusion
B. High-dose steroid therapy
C. Emergency laparotomy
D. Additional ultrasound evaluation
E. Continue staged fluid resuscitation

4. A 55-year-old female patient is brought in due to increasing fatigue and altered consciousness over the past two days. Her blood pressure is measured at 85/55 mmHg, heart rate at 120 bpm, temperature at 38.5°C, and lactate level at 5 mmol/L. On physical examination, dry mucous membranes and cold extremities are noted.

What is the most likely diagnosis in this patient?

A) Cardiogenic shock
B) Septic shock
C) Hypovolemic shock
D) Neurogenic shock
E) Anaphylactic shock

5. Which of the following is the most distinguishing feature between hypovolemic shock and cardiogenic shock?

A) In hypovolemic shock, central venous pressure (CVP) is high, whereas in cardiogenic shock, it is low.
B) Cardiogenic shock usually presents with pulmonary edema, whereas hypovolemic shock does not have pulmonary edema.
C) In hypovolemic shock, lactate levels do not rise, whereas in cardiogenic shock, lactate levels increase.
D) Hypovolemic shock typically presents with bradycardia, while cardiogenic shock presents with tachycardia.
E) Cardiogenic shock responds quickly to fluid resuscitation, whereas hypovolemic shock does not.

6. A 40-year-old female patient is brought to the emergency department after developing rapidly progressive shortness of breath, widespread itching, and altered consciousness following a bee sting. Her heart rate is 135 bpm, blood pressure is 70/45 mmHg, and SpO₂ is 88%.

What is the most appropriate emergency treatment approach for this patient?

A) IV fluids and high-dose corticosteroids
B) Intravenous epinephrine administration
C) Antihistamines and bronchodilator inhalation therapy
D) IV magnesium sulfate administration
E) Initiate a beta-blocker

7. When should epinephrine be administered intravenously (IV) in the management of anaphylactic shock?

A) In mild cases, after intramuscular (IM) epinephrine as an additional treatment
B) When the patient's blood pressure is below 90/60 mmHg
C) In cases resistant to epinephrine treatment, before corticosteroid therapy
D) When the patient complains of shortness of breath
E) If hypotension and shock signs persist despite intramuscular (IM) epinephrine administration

8. A 55-year-old male patient is brought to the emergency department due to altered consciousness and fatigue. The following are the results of his arterial blood gas analysis:
• pH: 7.20
• pCO₂: 30 mmHg
• HCO₃⁻: 12 mEq/L
• Anion gap (AG): 22 mEq/L

Which of the following diagnoses is most likely in this patient?

A) Respiratory acidosis due to chronic obstructive pulmonary disease (COPD)
B) Metabolic alkalosis due to severe dehydration
C) Respiratory alkalosis due to salicylate poisoning
D) Lactic acidosis with wide anion gap metabolic acidosis
E) Renal tubular acidosis type 1

9. Which of the following is **not** a cause of high anion gap metabolic acidosis?

A) Uremic acidosis
B) Ketoacidosis
C) Lactic acidosis
D) Renal tubular acidosis
E) Methanol poisoning

10. A 60-year-old patient with chronic obstructive pulmonary disease (COPD) presents to the emergency department with shortness of breath and confusion. The following are the results of his arterial blood gas analysis:
• pH: 7.28
• pCO₂: 65 mmHg
• HCO₃⁻: 30 mEq/L

What is the most likely explanation for the acid-base disturbance in this patient?

A) Acute respiratory alkalosis
B) Chronic respiratory acidosis
C) Metabolic acidosis
D) Acute/chronic respiratory acidosis
E) Mixed acid-base disturbance

11. A 25-year-old female patient presents to the emergency department with severe shortness of breath and wheezing that started in the early morning. She has a history of asthma and regularly uses an inhaler bronchodilator. On physical examination, she is observed to be struggling to speak and using accessory respiratory muscles. Wheezing is heard on auscultation.

Which of the following emergency treatment options will provide the fastest and most effective result?

A) Nebulized ipratropium bromide
B) Subcutaneous adrenaline
C) Nebulized short-acting beta-agonist (SABA)
D) IV magnesium sulfate
E) IV corticosteroids

12. A 68-year-old male patient presents to the emergency department with worsening shortness of breath, increased sputum production, and yellow-green colored sputum. The patient has a diagnosis of COPD and is receiving oxygen therapy. Vital signs are as follows:

- Blood pressure: 125/80 mmHg
- Heart rate: 110 bpm
- Respiratory rate: 28 breaths/min
- SpO₂: 88%

What is the most appropriate initial management for this patient in the emergency setting?

A) Intravenous furosemide
B) Nebulized short-acting beta-agonist and anticholinergic combination
C) IV antibiotic administration
D) High-flow oxygen therapy (FiO₂ 100%)
E) Initiation of methylxanthine (theophylline)

13. A 65-year-old male patient presents to the emergency department with sudden onset of palpitations and shortness of breath. A 12-lead ECG shows regular tachycardia with wide QRS complexes. The patient's blood pressure is 85/50 mmHg, and there is confusion present.

What is the most appropriate initial treatment approach for this patient?

A) IV Adenosine
B) IV Amiodarone
C) IV Metoprolol
D) Synchronized cardioversion
E) IV Verapamil

14. A 78-year-old male patient presents with irregular rhythm, rapid palpitations, and shortness of breath. An ECG reveals atrial fibrillation with a rapid ventricular response. His blood pressure is 120/80 mmHg, and there are no signs of cardiovascular instability.

Which of the following is the most appropriate initial pharmacological treatment for this patient?

A) IV Adenosine
B) IV Metoprolol
C) IV Amiodarone
D) IV Lidocaine
E) IV Dopamine

15. A 52-year-old patient is brought to the emergency department after out-of-hospital cardiac arrest. Ventricular fibrillation (VF) is observed on the monitor. While CPR is ongoing, what is the most appropriate first electrical treatment option?

A) Synchronized cardioversion
B) IV Amiodarone
C) IV Adenosine
D) Asynchronous defibrillation
E) IV Atropine

16. Which of the following antiarrhythmic drugs is the first-line treatment for AV nodal reentrant tachycardia (AVNRT)?

A) Amiodarone
B) Lidocaine
C) Adenosine
D) Diltiazem
E) Sotalol

17. A 38-year-old male patient is brought to the emergency department after a fire with complaints of headache, confusion, and nausea. His arterial blood gas shows a carboxyhemoglobin level of 30%. His oxygen saturation is measured at 98%.

Which of the following is the most appropriate treatment option for this patient?

A) High-flow nasal oxygen therapy
B) Non-invasive mechanical ventilation
C) 100% normobaric oxygen therapy
D) Hyperbaric oxygen therapy
E) IV sodium thiosulfate

18. Which of the following is not an emergency indication for hyperbaric oxygen therapy?

A) Decompression sickness
B) Arterial gas embolism
C) Necrotizing fasciitis
D) Hypovolemic shock
E) Carbon monoxide poisoning

19. A 32-week pregnant woman presents to the emergency department with loss of consciousness and no breathing. In the rapid assessment, no pulse is detected, and cardiopulmonary resuscitation (CPR) is initiated.

What is the most important modification during CPR for this patient?

A) Starting CPR with the patient lying on their back
B) Increasing the compression rate
C) Performing deeper chest compressions
D) Applying CPR in the left lateral decubitus position
E) Not applying rapid defibrillation

20. Which of the following resuscitation approaches is the priority in patients with cardiac arrest due to drowning?

A) First, provide 2 rescue breaths
B) Immediately begin chest compressions
C) Apply defibrillation without checking the pulse
D) Start adrenaline treatment early
E) Prioritize hypothermia treatment

21. A 45-year-old male climber is brought to the emergency department with signs of frostbite. The patient is unconscious, has no pulse, and his body temperature is measured at 28°C. Which of the following resuscitation approaches is correct for this patient?

A) Defibrillation should be applied immediately
B) IV medication should be administered without delay
C) CPR should be performed, but defibrillation should be delayed until the temperature reaches 30°C
D) Resuscitation should be stopped immediately in case of cardiac arrest
E) Rapid external warming is not recommended

22. A 56-year-old patient with a body mass index of 42 kg/m² and diagnosed with Obstructive Sleep Apnea presents to the emergency department with respiratory distress. An intubation decision is made, but the Mallampati score is IV, and neck movements are restricted.

What is the most appropriate airway management strategy for this patient?

A) Direct laryngoscopy with rapid intubation
B) Nasotracheal intubation
C) Video laryngoscopy for intubation
D) Cricothyroidotomy
E) Use of a supraglottic airway device

23. Which of the following is not a condition where non-invasive mechanical ventilation (NIV) can be used?

A) COPD exacerbation and hypercapnic respiratory failure
B) Cardiogenic pulmonary edema
C) Hypovolemic shock
D) Respiratory failure due to neuromuscular diseases
E) Postoperative respiratory depression

24. A 45-year-old male patient has been admitted to the intensive care unit due to severe pneumonia and is on mechanical ventilation. The PEEP level is set at 12 cmH₂O, FiO₂ is 60%, and the patient's PaO₂ value is measured at 55 mmHg.

What is the most appropriate approach to increase oxygenation in this patient?

A) Increase FiO₂ to 100%
B) Place the patient in the prone position
C) Increase tidal volume
D) Reduce PEEP
E) Increase respiratory rate

25. In a 60-year-old COPD patient on mechanical ventilation, the high peak airway pressure alarm suddenly sounds. What should be the first intervention?

A) Extubate the patient
B) Increase PEEP pressure
C) Check the ventilator circuit and endotracheal tube for obstruction
D) Administer IV furosemide
E) Increase tidal volume

26. Which of the following mechanical ventilation modes is a full support mode that does not allow the patient to breathe spontaneously?

A) Assist-Control Ventilation (ACV)
B) Synchronized Intermittent Mandatory Ventilation (SIMV)
C) Pressure Support Ventilation (PSV)
D) Bilevel Positive Airway Pressure (BiPAP)
E) Continuous Positive Airway Pressure (CPAP)

27. A 68-year-old male patient presents to the emergency department after syncope. A complete atrioventricular (AV) block is detected on the monitor, and the patient’s heart rate is measured at 30 bpm. The patient's blood pressure is 80/50 mmHg, and confusion is present.

What is the most appropriate emergency treatment for this patient?

A) IV Atropine
B) IV Dopamine infusion
C) Transcutaneous pacing
D) IV Beta-blocker administration
E) High-dose corticosteroids

28. In which of the following patient groups should the target mean arterial pressure (MAP) be at least 80 mmHg to achieve hemodynamic stability?

A) Patients with septic shock due to sepsis
B) Hypovolemic shock patients without chronic hypertension
C) Patients with traumatic brain injury (TBI)
D) Hypotensive patients due to gastrointestinal bleeding
E) Patients with cardiogenic shock requiring inotropic support

29. A 45-year-old male patient is admitted to the intensive care unit due to sepsis. Due to the high requirement for vasopressors, central venous catheter placement is decided. Which of the following venous access sites carries the lowest risk of infection for central venous catheterization in this patient?

A) Femoral vein
B) Subclavian vein
C) Internal jugular vein
D) Anterior tibial vein
E) External jugular vein

30. Which of the following is NOT an advantage of performing intravenous access with ultrasound (USG) guidance?

A) Increases the success of catheter placement
B) Facilitates the differentiation between artery and vein during puncture
C) Reduces complication rates
D) Significantly increases the procedure time
E) Particularly useful for deep venous access

31. A 55-year-old male patient presents to the emergency department with complaints of retrosternal chest pain that has been ongoing for 30 minutes. The pain radiates to the shoulder and left arm, but it does not worsen with movement or improve with position changes. The ECG shows ST segment depressions, and troponin levels are elevated. What is the most likely diagnosis for this patient?

A) ST-elevation myocardial infarction (STEMI)
B) Non-ST-elevation myocardial infarction (NSTEMI)
C) Stable angina
D) Pericarditis
E) Aortic dissection

32. Which of the following scoring systems is used to identify patients at high risk for acute coronary syndrome (ACS) in the emergency department?

A) APACHE II
B) CHA₂DS₂-VASc
C) Wells Score
D) TIMI Score
E) SOFA Score

33. A 42-year-old female patient presents with chest pain. The pain lasts for 2-3 seconds, is sharp in nature, and is felt on the left side of the chest. The patient has no known history of cardiovascular disease, and the EKG is normal.

Which of the following diagnoses is the most likely in this patient?

A) Myocardial infarction
B) Aortic dissection
C) Pleural effusion
D) Non-cardiac chest pain (musculoskeletal pain)
E) Pericarditis

34. A 23-year-old female patient presents with a sudden fainting episode after standing for a long time in a hot environment. She reports feeling nausea and sweating before the fainting. Her vital signs are normal, and her ECG is clear.

What is the most likely diagnosis in this patient?

A) Cardiac arrhythmia
B) Aortic dissection
C) Vasovagal syncope
D) Pulmonary embolism
E) Subarachnoid hemorrhage

35. Which of the following conditions is not appropriate for discharging a patient who has experienced syncope?

A) Normal ECG findings
B) Age 20 and no known history of cardiac disease
C) Presence of prodromal symptoms before syncope
D) Family history of sudden cardiac death
E) Normal blood pressure and vital signs

36. A 65-year-old male patient experiences sudden loss of consciousness and syncope while at rest. The patient quickly recovers, but during the event, he hits his head. A new bifascicular block is observed on the ECG.

What is the most appropriate approach for this patient?

A) Discharge and outpatient follow-up
B) ECG monitoring and 24-hour monitoring
C) Cardiac pacemaker implantation
D) Broad-spectrum antibiotic therapy
E) Fluid resuscitation and oral hydration advice

37. A 70-year-old male patient presents with sudden onset of shortness of breath and orthopnea. Bilateral rales are heard on auscultation, the ECG shows sinus tachycardia, and a chest X-ray reveals pulmonary edema.

Which of the following is not part of the initial treatment for this patient?

A) High-dose IV furosemide
B) Non-invasive ventilation (CPAP/BiPAP)
C) IV nitrat therapy
D) IV fluid administration
E) Oxygen support

38. Which of the following is not one of the classic symptoms of aortic stenosis?

A) Exertional dyspnea
B) Syncope
C) Chest pain
D) Tachycardia
E) Congestive heart failure

39. A 65-year-old male patient presents to the emergency department with sudden onset of shortness of breath and chest pain. It is learned that the patient had hip replacement surgery 5 days ago. On physical examination, mild tachycardia (105 bpm) is noted, and the ECG shows sinus tachycardia. What is the most appropriate initial diagnostic approach for this patient?

A) D-dimer test
B) Chest X-ray
C) Echocardiography for right ventricular assessment
D) Pulmonary CT angiography

E) IV thrombolytic therapy

40. A 50-year-old male patient presents with swelling and pain in his right leg for the past 2 days. Doppler ultrasound reveals proximal DVT. The patient has a low risk of bleeding and is hemodynamically stable. What is the most appropriate initial treatment for this patient?

A) IV heparin loading and then oral warfarin
B) Start with low-molecular-weight heparin (LMWH)
C) Administer thrombolytic therapy
D) Surgical thrombectomy
E) Placement of an inferior vena cava filter

41. A 67-year-old male patient presents to the emergency department with severe headache, blurred vision, and confusion. His blood pressure is measured at 240/130 mmHg. Fundoscopy reveals papilledema and retinal hemorrhages. What is the most likely diagnosis for this patient?

A) Hypertensive encephalopathy
B) Subarachnoid hemorrhage
C) Acute ischemic stroke
D) Aortic dissection
E) Pheochromocytoma crisis

42. Which of the following is classified as Group 1 (Pulmonary Arterial Hypertension - PAH) in the World Health Organization (WHO) Pulmonary Hypertension Classification?

A) Pulmonary hypertension due to left ventricular failure
B) Chronic thromboembolic pulmonary hypertension
C) Pulmonary hypertension due to COPD and interstitial lung disease
D) Idiopathic pulmonary arterial hypertension
E) Pulmonary hypertension due to mitral stenosis

43. A 52-year-old female patient with a known diagnosis of pulmonary hypertension presents to the emergency department with sudden onset of shortness of breath and hypotension. On physical examination, jugular vein distension and a right ventricular S3 sound are noted.

What is the first-line treatment for this patient?

A) IV fluid loading
B) High-dose diuretics
C) IV norepinephrine infusion
D) IV beta-blocker administration
E) High-flow oxygen therapy

44. A 63-year-old male patient presents to the emergency department with sudden onset, tearing chest pain radiating to the back. On physical examination, the blood pressure in the right arm is 160/95 mmHg, while in the left arm it is 125/80 mmHg. Additionally, a pulse deficit is noted. What is the most likely diagnosis for this patient?

A) Acute myocardial infarction
B) Pulmonary embolism
C) Aortic dissection
D) Spontaneous pneumothorax
E) Pericarditis

45. Which of the following is incorrect among the classical "6P" findings seen in acute arterial occlusion?

A) Pain
B) Pallor
C) Pulselessness
D) Polyuria
E) Paresthesia

46. A 65-year-old male patient presents to the emergency department with sudden-onset shortness of breath, tachycardia, and cyanosis. The patient has a history of COPD. Arterial blood gas results show: pH: 7.28, PaCO₂: 58 mmHg, PaO₂: 55 mmHg. What type of respiratory failure does this patient have?

A) Type 1 (Hypoxemic Respiratory Failure)
B) Type 2 (Hypercapnic Respiratory Failure)
C) Type 3 (Perioperative Respiratory Failure)
D) Type 4 (Respiratory Failure Associated with Shock)
E) Acute Respiratory Distress Syndrome (ARDS)

47. Which of the following is NOT one of the diagnostic criteria for Acute Respiratory Distress Syndrome (ARDS)?

A) Acute onset (respiratory distress developing within 1 week)
B) Bilateral lung infiltrates
C) Non-cardiogenic pulmonary edema
D) Alkalosis with pH >7.45
E) Decrease in PaO₂/FiO₂ ratio

48. A 48-year-old male patient is being followed in the intensive care unit with a diagnosis of sepsis. The patient has developed bilateral lung infiltrates and hypoxemia, with a PaO₂/FiO₂ ratio calculated as 120.

What is the most likely diagnosis for this patient?

A) Pulmonary embolism
B) Septic shock
C) Acute Respiratory Distress Syndrome (ARDS)
D) Cardiogenic pulmonary edema
E) Asthma attack

49. A 40-year-old male patient is brought to the emergency department after a stabbing injury. The patient presents with shortness of breath, tachycardia, and decreased breath sounds on the right lung. A chest radiograph reveals a pneumothorax on the right side. What is the most appropriate initial intervention for this patient?

A) Start high-flow oxygen and observe
B) Perform thoracentesis to drain fluid
C) Perform tube thoracostomy
D) Perform emergency thoracotomy
E) Start intravenous antibiotic therapy

50. In a patient with trauma-induced pericardial tamponade in the emergency department, which of the following is the most appropriate entry point for pericardiocentesis?

A) Parasternal approach from the left 5th intercostal space
B) Midclavicular approach from the right 4th intercostal space
C) Subxiphoid approach (subxiphoid pericardiocentesis)
D) Access via the internal jugular vein
E) Access from the anterior axillary line
